# Supplementary material
Source: publisher figshare collection journal article supplement (https://karger.figshare.com/ndownloader/files/20134742)
Supplement: Supplementary file 1 [file 20134742]

## Sheet: Right ventricle
	Gestational age										Estimated fetal weight
		Weeks	Days										Grams
							0										0
	Right ventricle				z-score	centile	Observed	Expected	z-score		Right ventricle				z-score	centile	Observed	Expected	z-score
		End-diastolic area (cm2)				#VALUE!	#NUM!	-5.51674	#NUM!	0.253901		End-diastolic area (cm2)				#VALUE!	#NUM!	#NUM!	#NUM!	0.24296
		End-systolic area (cm2)				#VALUE!	#NUM!	-6.20766	#NUM!	0.267337		End-systolic area (cm2)				#VALUE!	#NUM!	#NUM!	#NUM!	0.25606
		FAC				#VALUE!	0	51.4901	-6.00176	8.57916		FAC		#DIV/0!	#DIV/0!	#DIV/0!	#DIV/0!	36.4143	#DIV/0!	8.4814
